# Supplementary material
Source: PubMed Central journal article supplement (PMC3311259)

**Figure S1. EP2 is most abundantly expressed among EP receptors and is further upregulated during macrophage maturation.** Freshly flushed bone marrow cells were cultured for up to 6 days in the presence of 30% L929 supernatant; after 3 days, cultures were replenished with new medium totaling 50% of original volume. At each day of the 6 day culture, cells were collected and analyzed for the expression of EP receptors with qRT-PCR. Data presented in all panels are expressed as the mean  $\pm$  SEM from 4 experiments, each utilizing cells from a single mouse. \*  $p < 0.05$ ; n.d. – not detectable

**Figure S2. Percentage of peritoneal mononuclear cells does not differ between wild type and EP2<sup>-/-</sup> mice in thioglycollate induced peritonitis.** EP2<sup>-/-</sup> and wild type mice were injected intraperitoneally with thioglycollate. Peritoneal cells were isolated by lavage 4 days later and prepared for microscopic inspection with modified Wright-Giemsa staining. 300 cells were differentially counted per one cytospin at 100 $\times$  magnification.

**Figure S3. EP2<sup>-/-</sup> mice exhibit increased macrophage maturation in a model of thioglycollate peritonitis.** (A) EP2<sup>-/-</sup> mice after intraperitoneal injection with thioglycollate have higher expression of F4/80 on peritoneal cells compared to wild type mice. EP2<sup>-/-</sup> and wild type mice were injected intraperitoneally with thioglycollate. Peritoneal cells were isolated by lavage 4 days later and stained with CD11b-FITC, F4/80-APC and CD115-PE. Mean fluorescent intensity (MFI) for F4/80 is expressed as the mean  $\pm$  SEM from 3 experiments, each employing a different mouse. MFI was compared between both genotypes using a paired t-test. \*  $p < 0.05$ . (B) and (C) EP2<sup>-/-</sup> mice have a higher percentage of blood monocytes during peritonitis compared to wild type mice. Blood leukocytes were obtained from EP2<sup>-/-</sup> and wild type mice 4 days after

intraperitoneal injection of thioglycollate and analyzed by Coulter counter. Blood cell analysis was compared between both genotypes using a paired t-test. \*  $p < 0.05$

Fig.S1

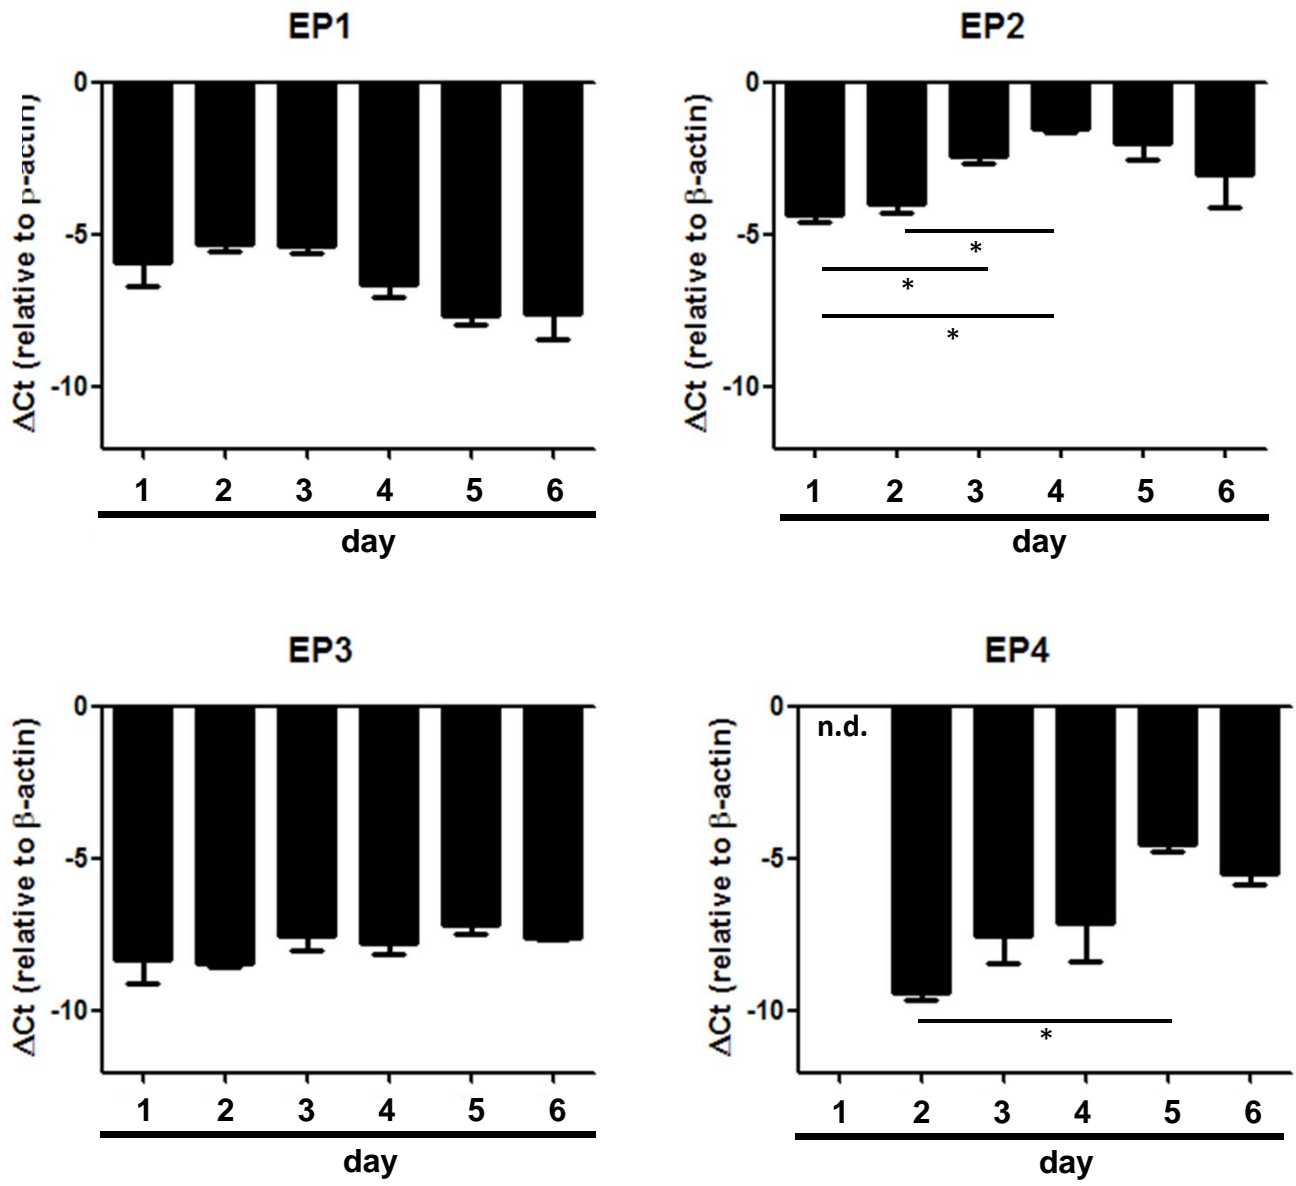

Fig.S2

wt (100x)

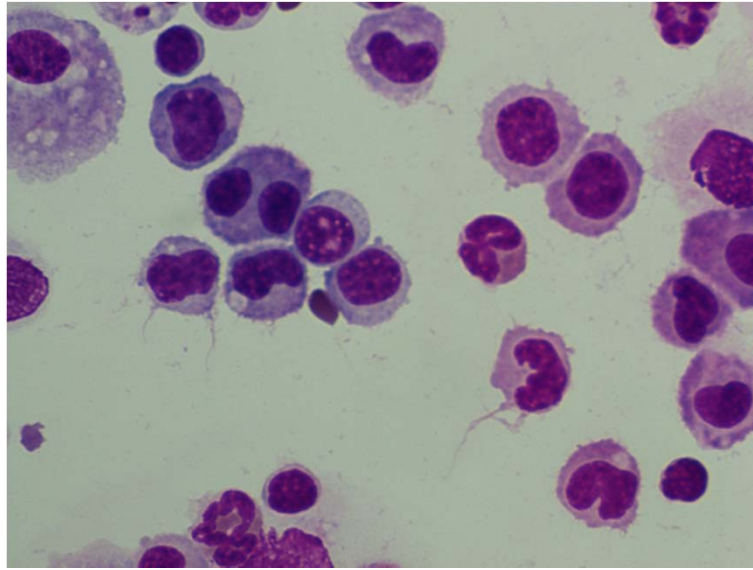

EP2<sup>-/-</sup> (100x)

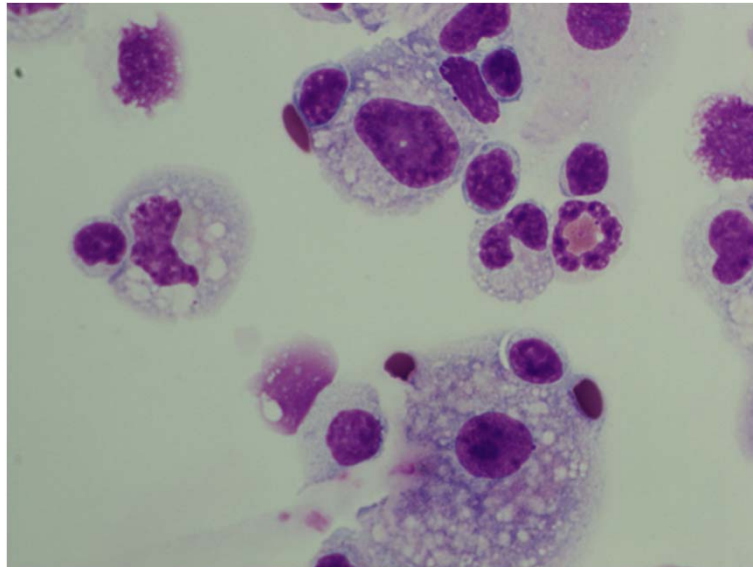

Fig.S3

A

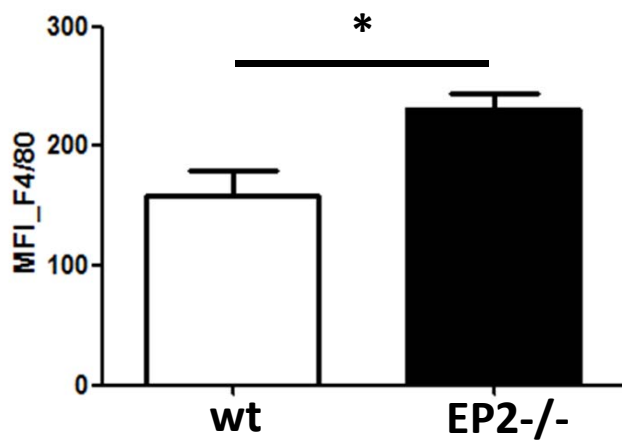

B

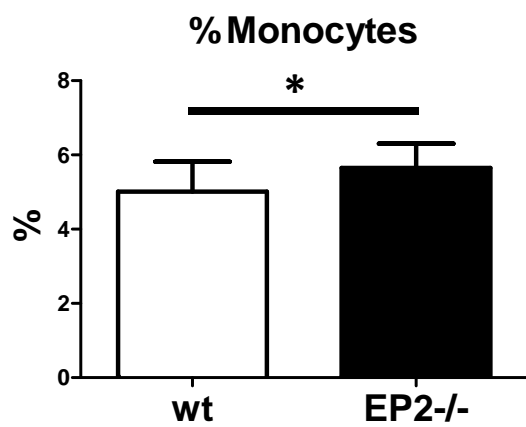

C

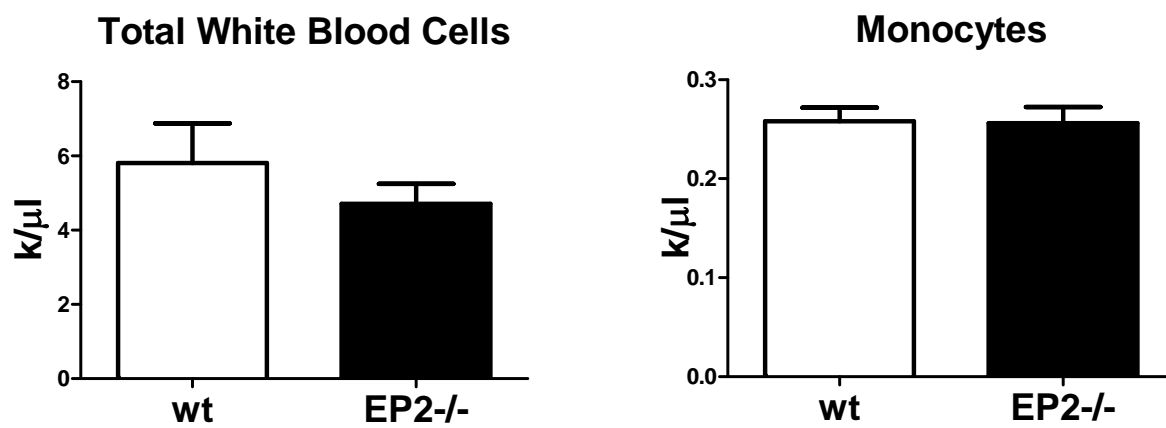

Supplement: supp_blood-2011-08-374207_blood-2011-08-374207-1.pdf [file supp_blood-2011-08-374207_blood-2011-08-374207-1.pdf]
